# Supplementary material for: Validation of KASP-SNP markers in cassava germplasm for marker-assisted selection of increased carotenoid content and dry matter content
Source: Frontiers journal article supplement (doi:10.3389/fpls.2022.1016170), 2022-10-12
Supplement: Data_Sheet_1.pdf [file Data_Sheet_1.pdf]

### *Supplementary Material*

|                                |
|--------------------------------|
| WHITE / BLANCO                 |
| LIGHT CREAM / CREMA CLARO      |
| CREAM / CREMA                  |
| LIGHT YELLOW / AMARILLO CLARO  |
| YELLOW / AMARILLO              |
| YELLOW DEEP / AMARILLO INTENSO |
| ORANGE / ANARANJADO            |

Supplementary Figure 1: Standard color-chart for scoring cassava tissue for carotenoid content

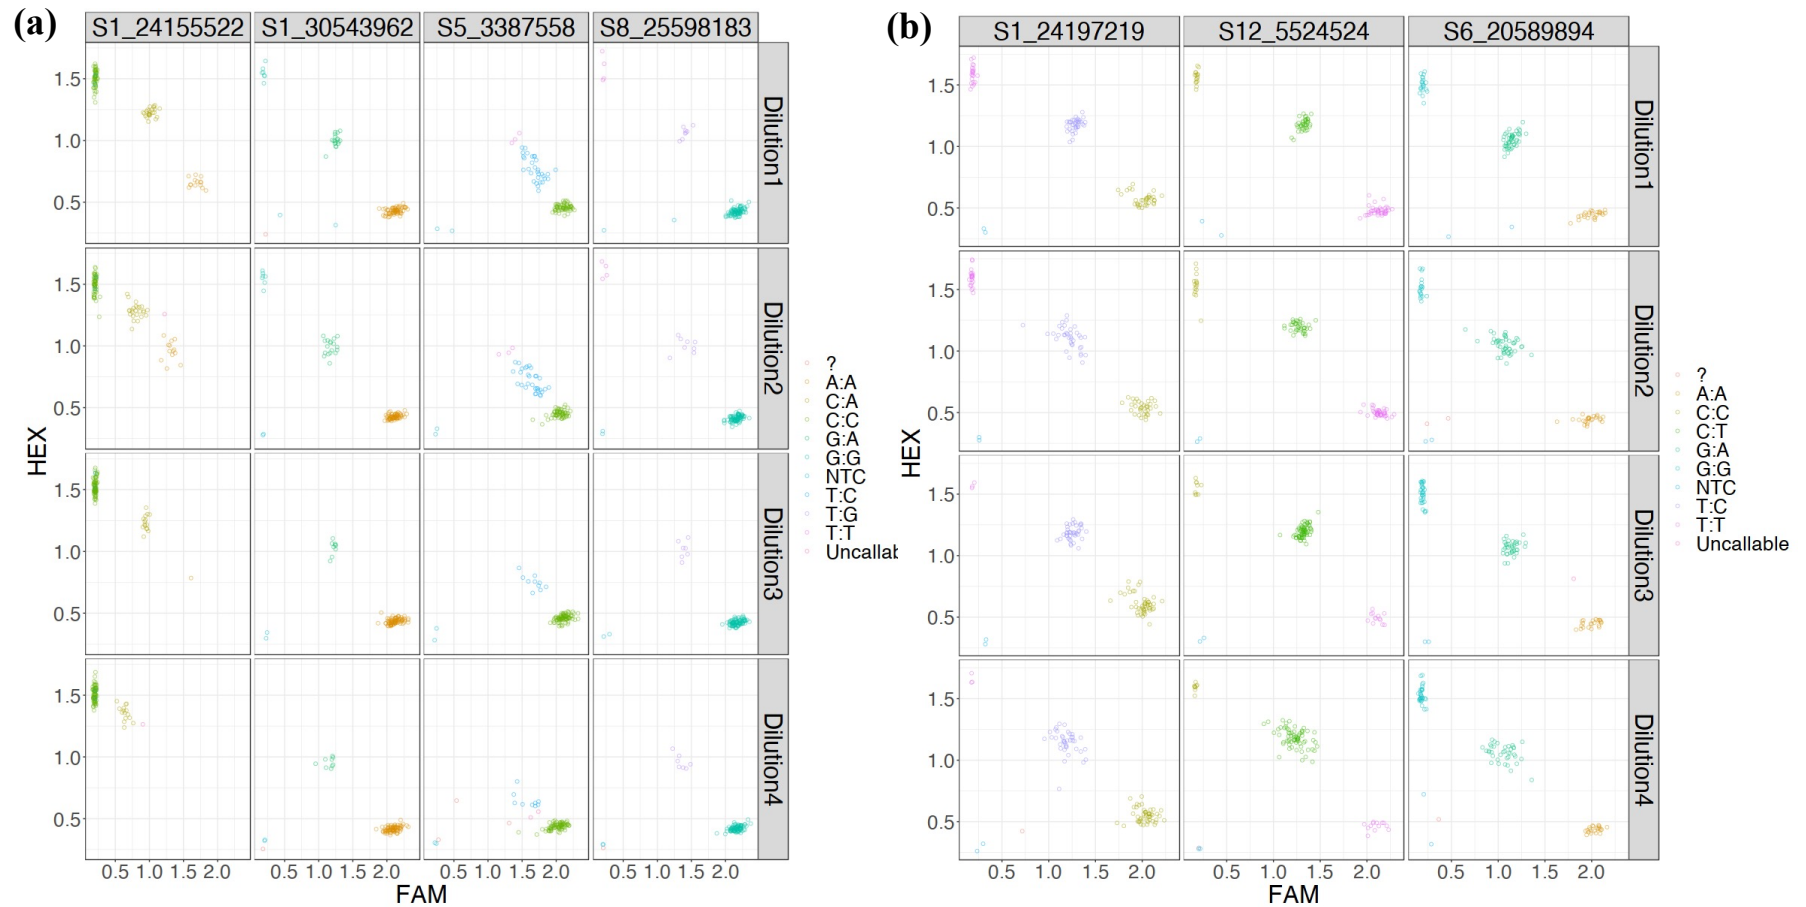

Supplementary Figure 2: Scatter plots of genotypic classes from the KASP marker assays associated with increased (a) carotenoid content and (b) dry matter content in the 188 diverse cassava germplasm used for the technical validation at four DNA concentrations (Dilution 1 = 10X, Dilution 2 = 100X, Dilution 3 = 24X, Dilution 4 = 240)

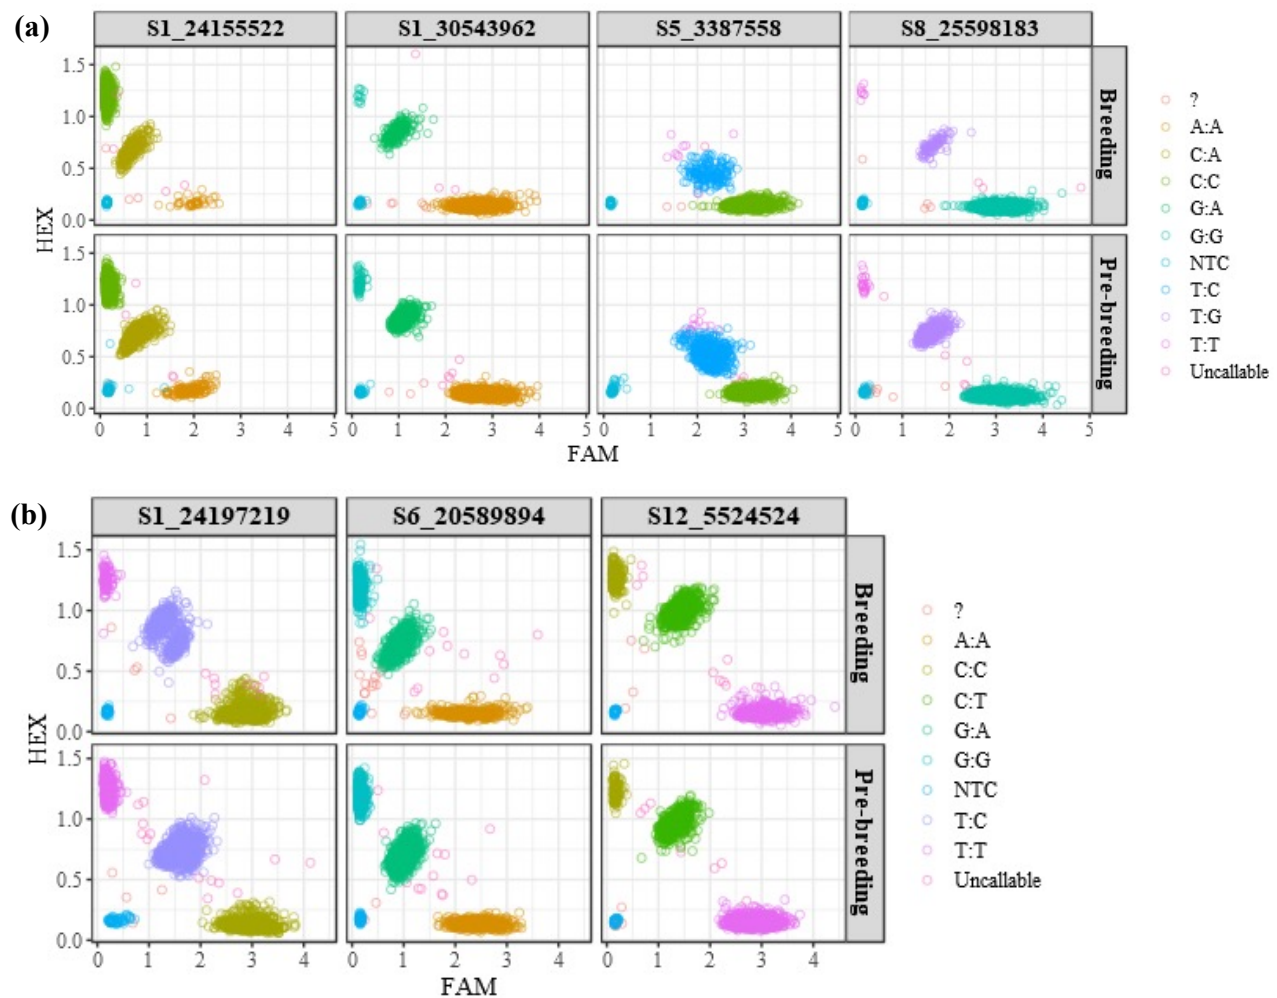

Supplementary Figure 3: Scatter plots of genotypic classes from the KASP marker assays associated with increased (a) carotenoid content and (b) dry matter content in the breeding and pre-breeding populations

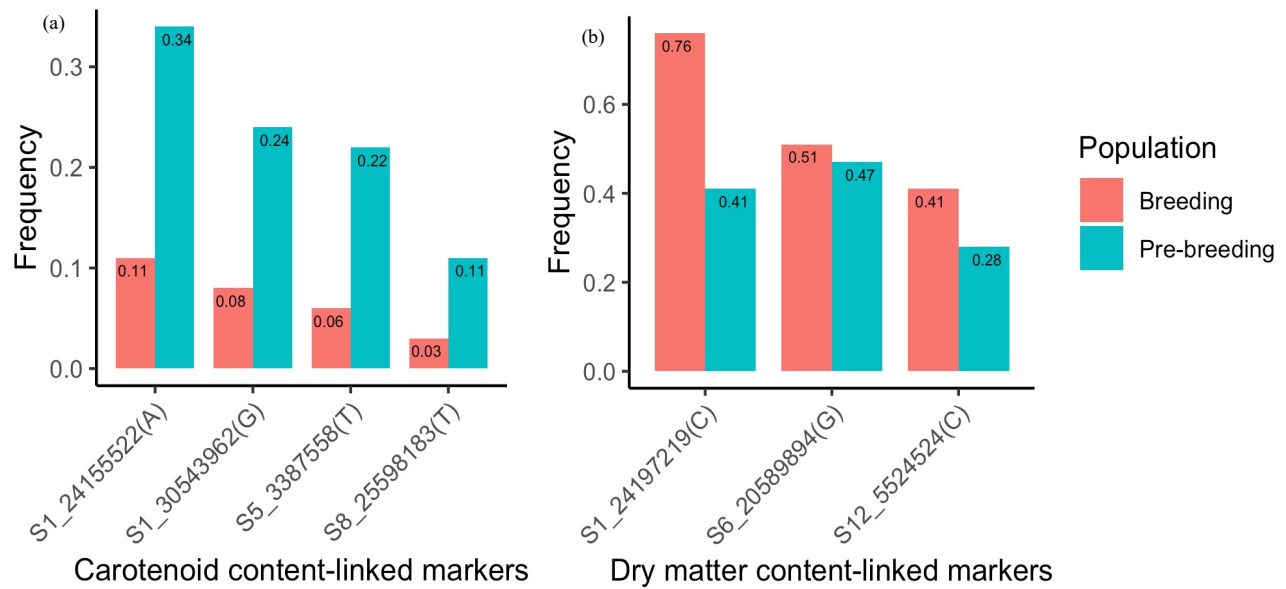

Supplementary Figure 4: Frequencies of favorable alleles at the markers associated with increased (a) carotenoid and (b) dry matter content in the breeding and pre-breeding populations

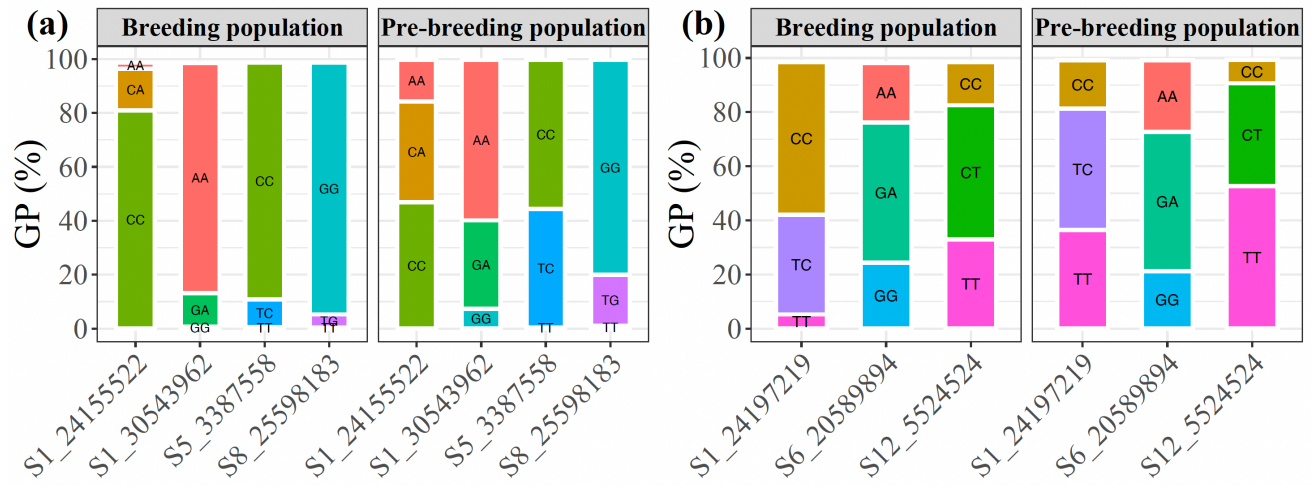

Supplementary Figure 5: Marker genotype frequencies associated with increased (a) carotenoid content and (b) dry matter content in the breeding and pre-breeding populations  
GP: Genotype percentage

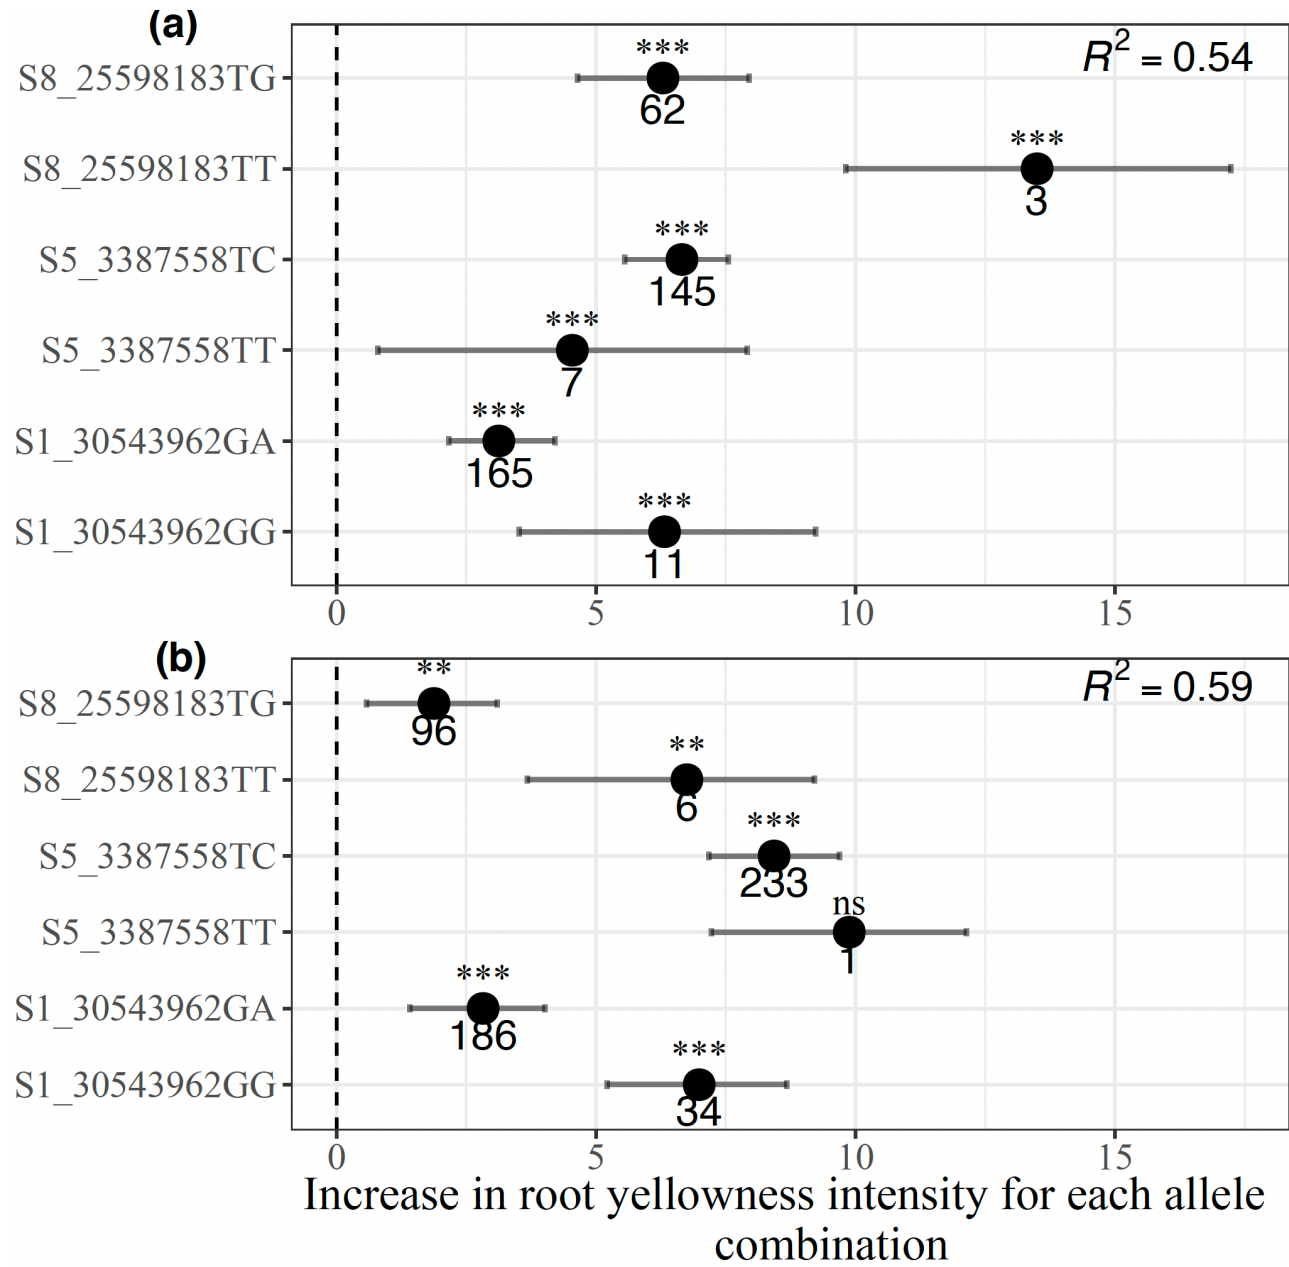

Supplementary Figure 6: Distribution of marker allelic effects associated with increased carotenoid content in (a) breeding, and (b) pre-breeding populations (The multiple linear regression model excluded marker S1\_24155522)

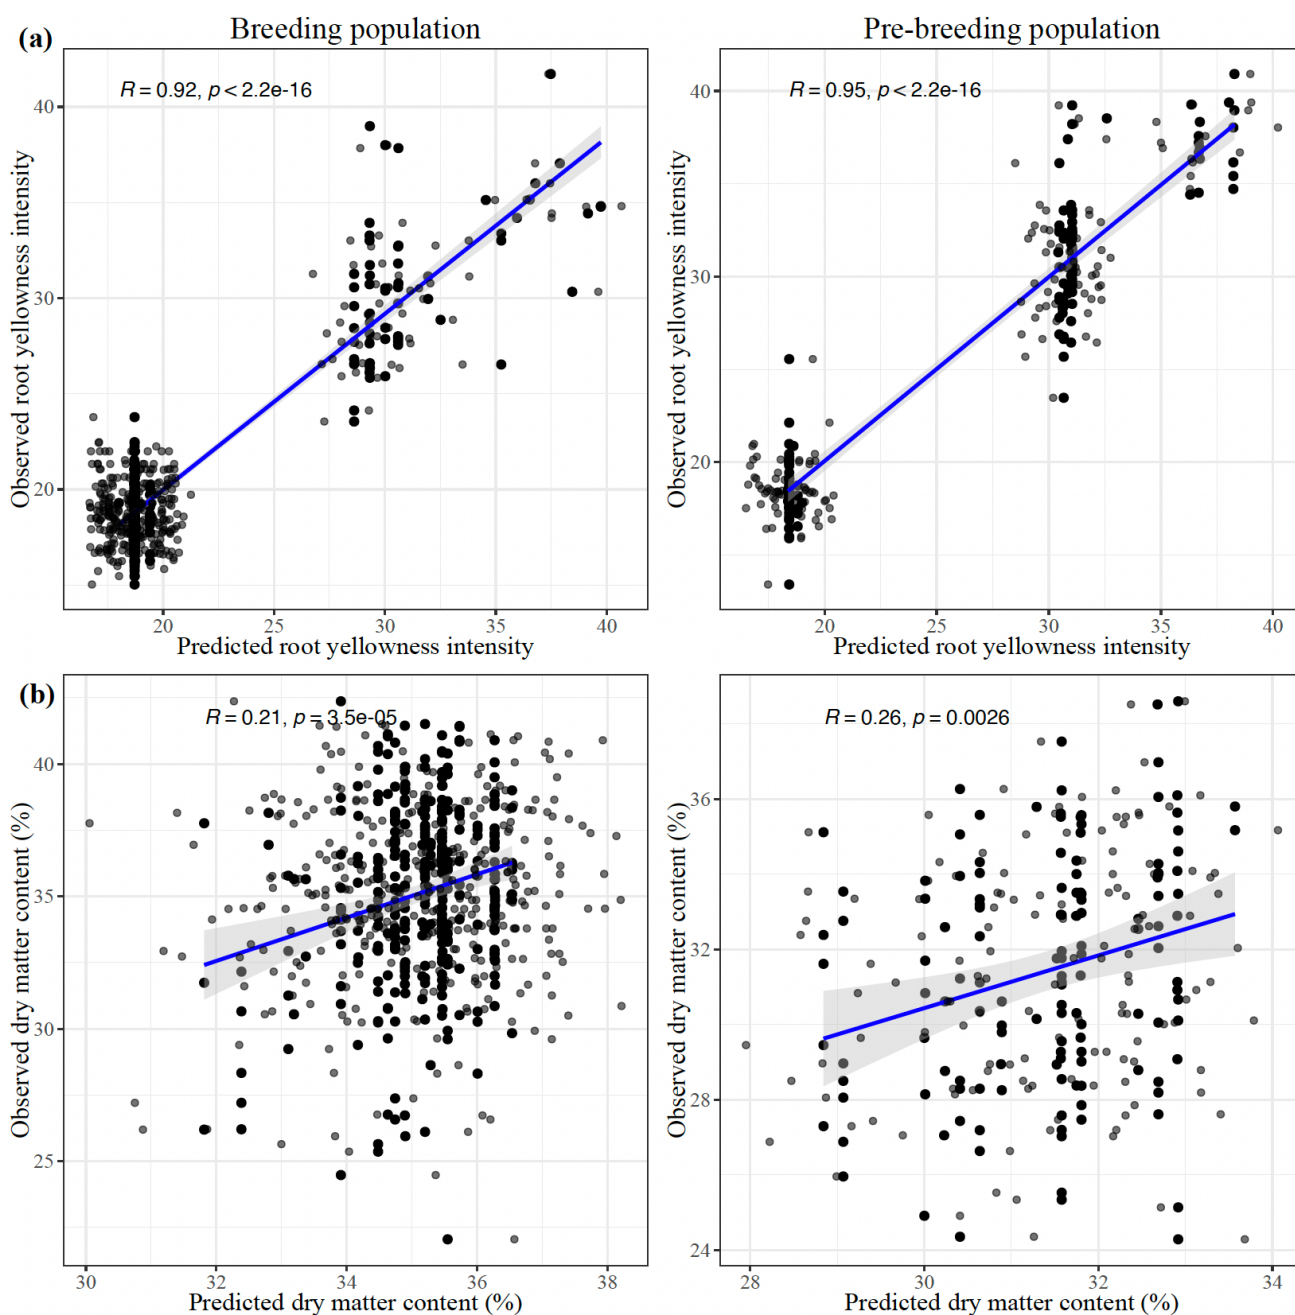

Supplementary Figure 7: Predictive accuracies of the markers associated with increased (a) carotenoid content and, (b) dry matter content in the testing sets of the breeding and pre-breeding populations

Supplementary Table 1: Number of predicted genotypes and uncalleable for markers linked to increased carotenoid content and dry matter content in the breeding and pre-breeding populations

| Traits             | Populations  | S1_24155522 |     |      |            |               |
|--------------------|--------------|-------------|-----|------|------------|---------------|
|                    |              | AA          | CA  | CC   | Uncallable | Call rate (%) |
| Carotenoid content | Breeding     | 40          | 271 | 1416 | 23         | 98.7          |
|                    | Pre-breeding | 122         | 296 | 370  | 2          | 99.7          |
|                    |              | S1_30543962 |     |      |            |               |
|                    |              | GG          | GA  | AA   | Uncallable | Call rate (%) |
|                    | Breeding     | 14          | 216 | 1495 | 25         | 98.6          |
|                    | Pre-breeding | 58          | 259 | 470  | 3          | 99.6          |
|                    |              | S5_3387558  |     |      |            |               |
|                    |              | TT          | TC  | CC   | Uncallable | Call rate (%) |
|                    | Breeding     | 9           | 181 | 1537 | 23         | 98.7          |
|                    | Pre-breeding | 3           | 348 | 437  | 2          | 99.7          |
|                    |              | S8_25598183 |     |      |            |               |
|                    |              | TT          | TG  | GG   | Uncallable | Call rate (%) |
|                    | Breeding     | 7           | 85  | 1635 | 23         | 98.7          |
|                    | Pre-breeding | 8           | 150 | 629  | 3          | 99.6          |
| Dry matter content |              | S1_24197219 |     |      |            |               |
|                    |              | CC          | TC  | TT   | Uncallable | Call rate (%) |
|                    | Breeding     | 988         | 644 | 92   | 26         | 98.5          |
|                    | Pre-breeding | 141         | 354 | 288  | 7          | 99.1          |
|                    |              | S6_20589894 |     |      |            |               |
|                    |              | GG          | GA  | AA   | Uncallable | Call rate (%) |
|                    | Breeding     | 427         | 905 | 385  | 33         | 98.1          |
|                    | Pre-breeding | 168         | 406 | 209  | 7          | 99.1          |
|                    |              | S12_5524524 |     |      |            |               |
|                    |              | TT          | CT  | CC   | Uncallable | Call rate (%) |
|                    | Breeding     | 577         | 867 | 280  | 26         | 98.5          |
|                    | Pre-breeding | 416         | 300 | 69   | 5          | 99.4          |
